# Supplementary material for: Creation and preclinical evaluation of genetically attenuated malaria parasites arresting growth late in the liver
Source: PubMed Central journal article supplement (PMC9636417; doi:10.1038/s41541-022-00558-x), 2022-11-04
Supplement: 41541_2022_558_MOESM1_ESM.pdf [file 41541_2022_558_MOESM1_ESM.pdf]

Supplementary Figure 1

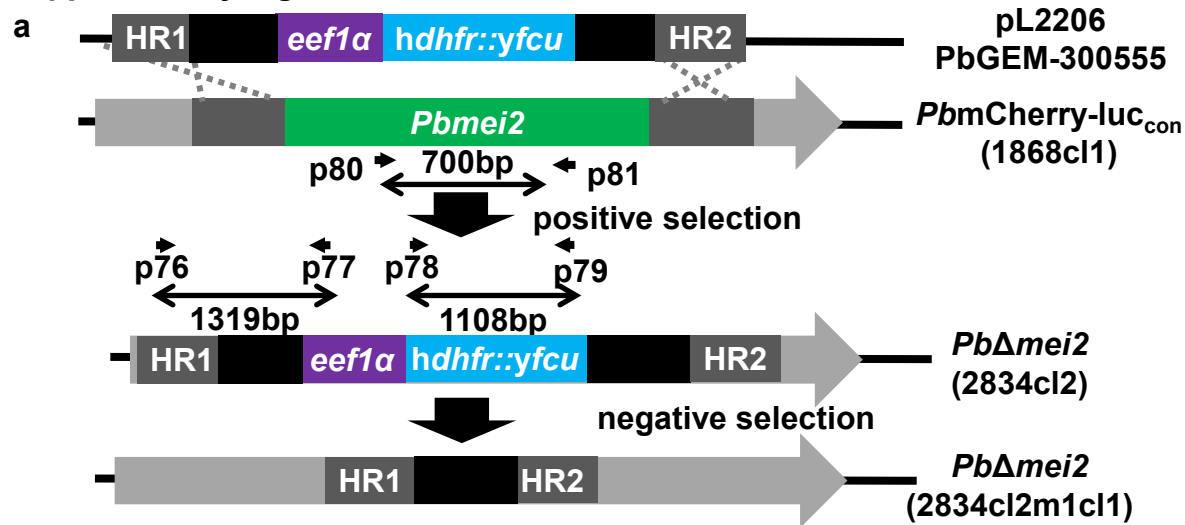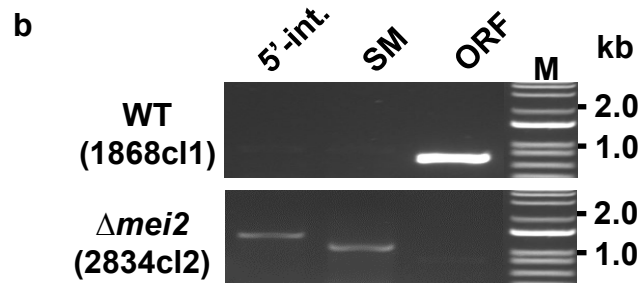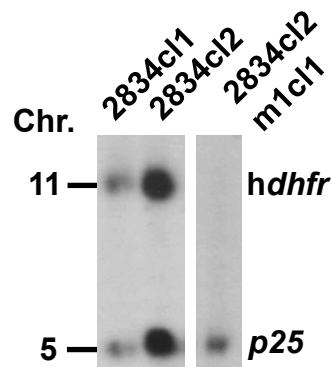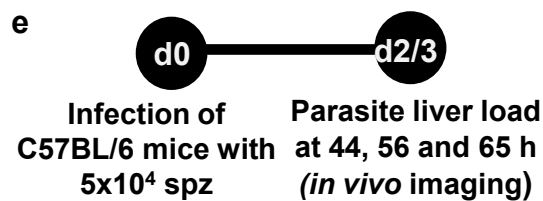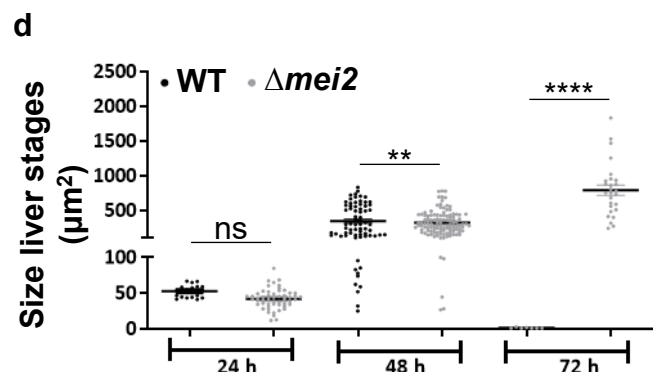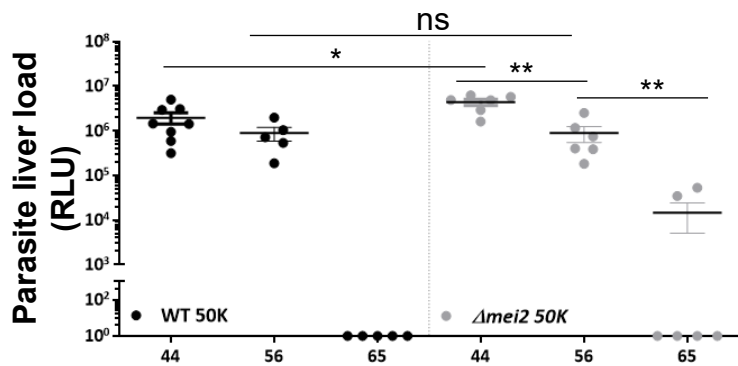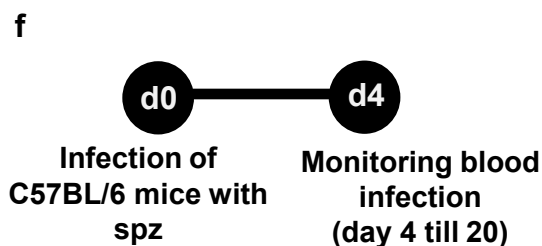

| Parasite           | No. of spz        | No. of mice patent <sup>a</sup> | No. of days to patency <sup>b</sup> |
|--------------------|-------------------|---------------------------------|-------------------------------------|
| WT                 | $5 \times 10^3$   | 10/10                           | 5                                   |
| WT                 | $50 \times 10^3$  | 10/10                           | 4-5                                 |
| <i>PbΔmei2</i>     | $5 \times 10^3$   | 0/6                             | n.a.                                |
| <i>PbΔmei2</i>     | $50 \times 10^3$  | 0/6                             | n.a.                                |
| <i>PbΔmei2</i>     | $200 \times 10^3$ | 3/10                            | 9-10                                |
| <i>PbΔmei2-b-a</i> | $200 \times 10^3$ | 5/11                            | 9-10                                |

<sup>a</sup> The number of mice that developed a blood stage infection

<sup>b</sup> The time of blood stage parasitemia between 0.5-2% WT: wild type; n.a. not applicable

# Supplementary Figure 2

**a**

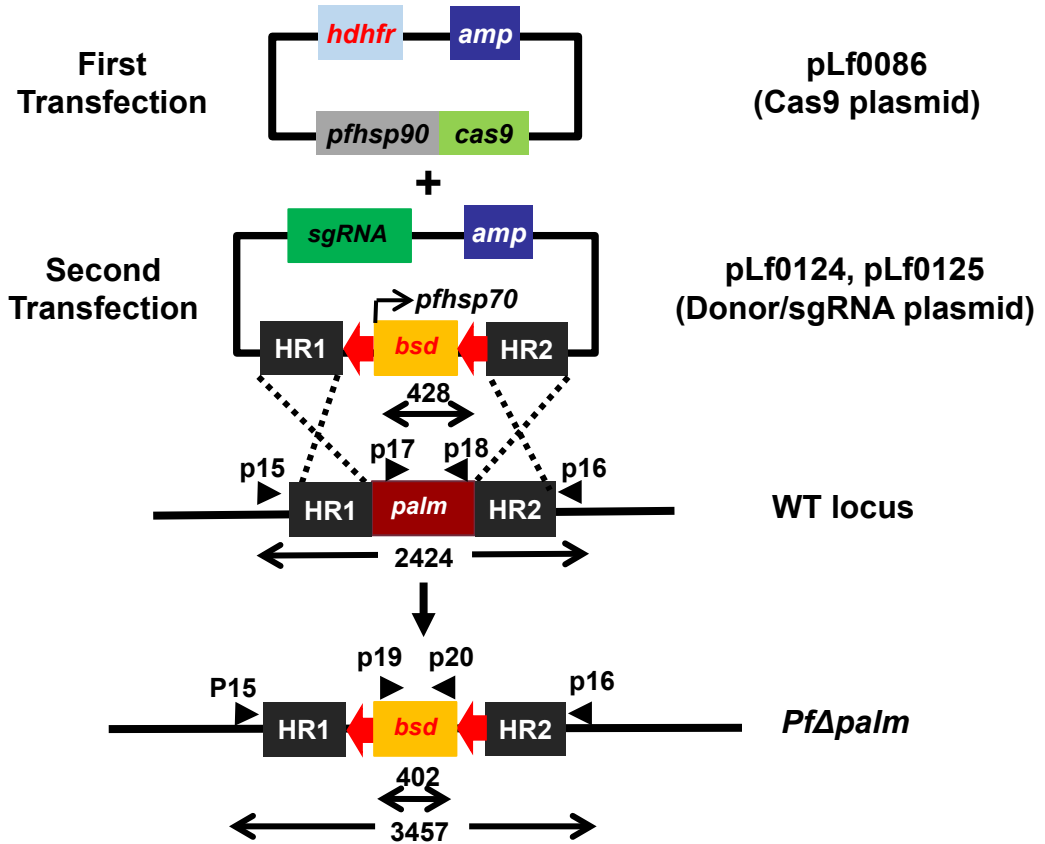

**b**

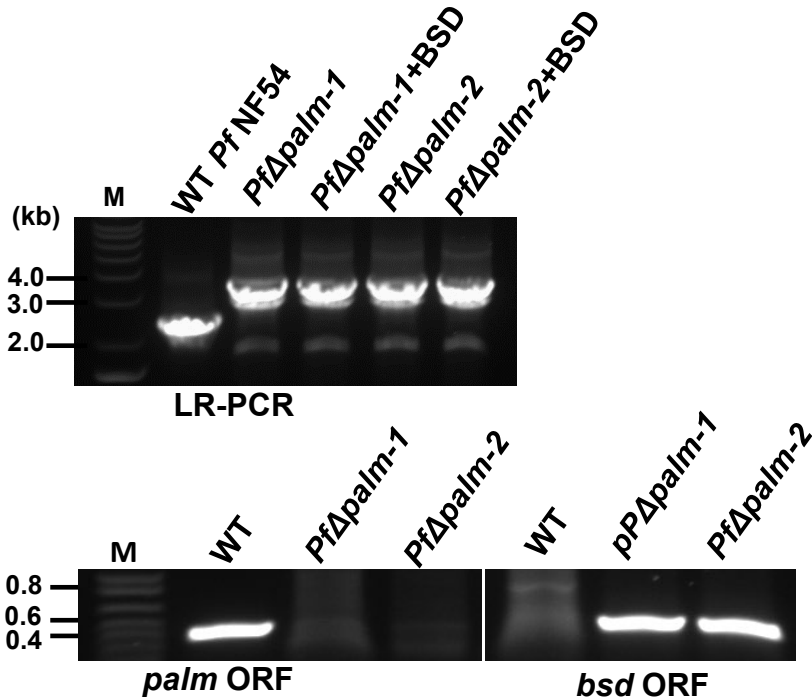

**c**

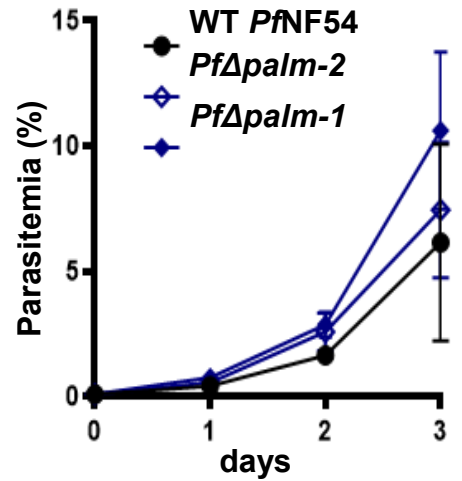

# Supplementary Figure 3

**a**

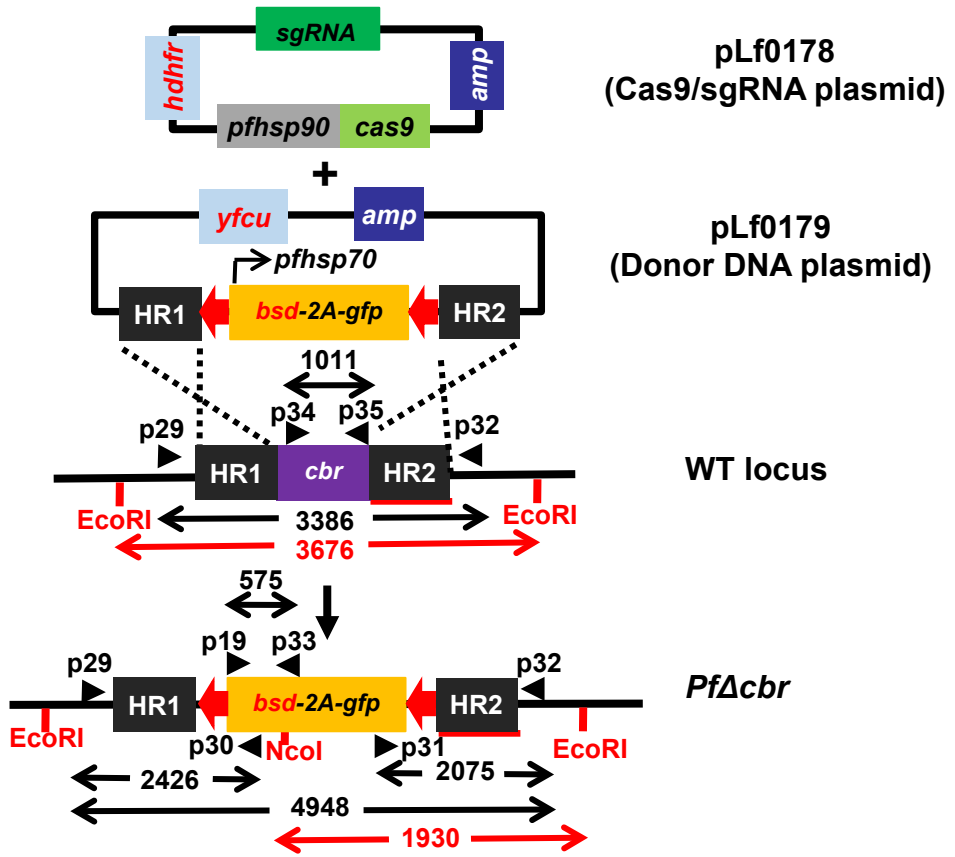

**b**

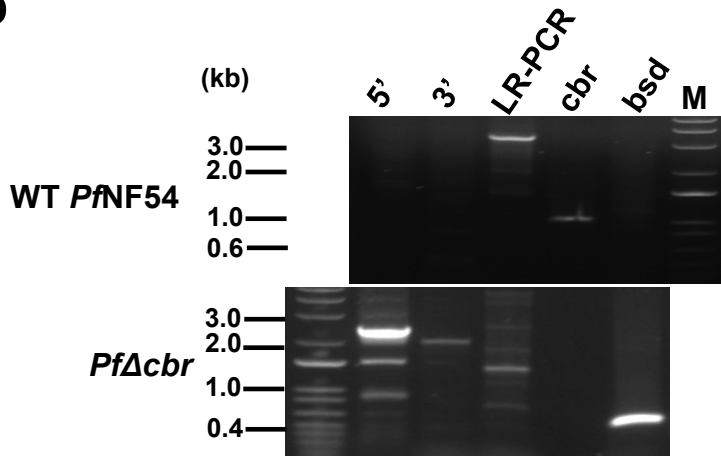

**c**

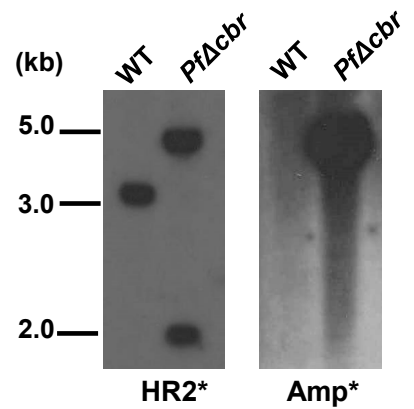

**d**

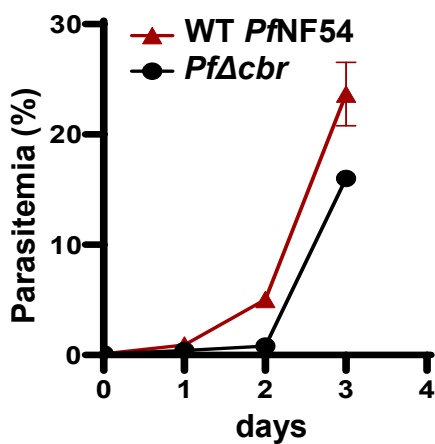

# Supplementary Figure 4

**a**

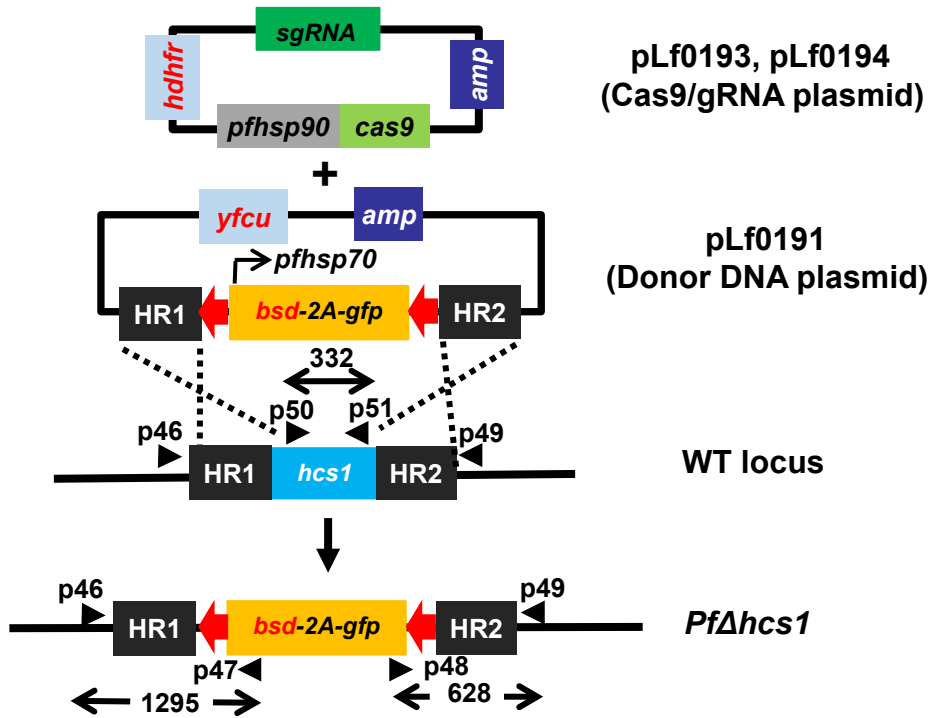

**b**

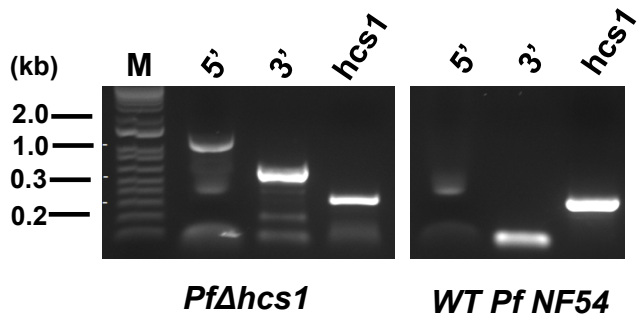

**c**

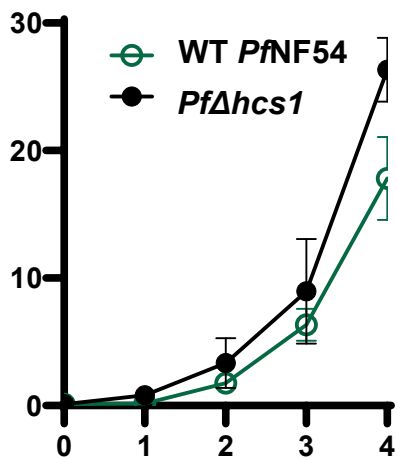

# Supplementary Figure 5

## WT *PfNF54*: sporozoite formation

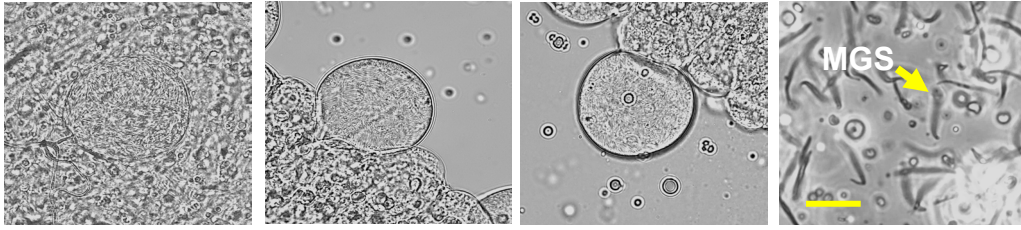

## *PfΔmei2*: sporozoite formation

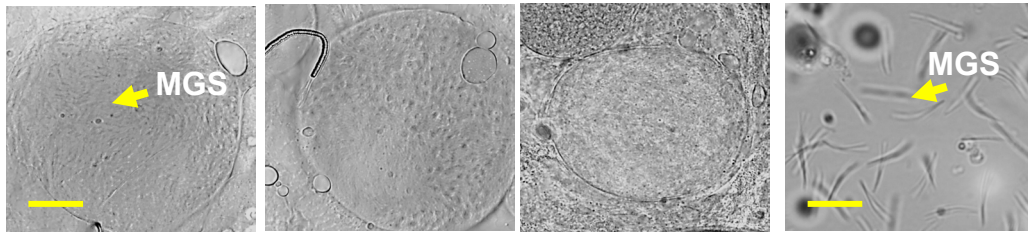

## *PfΔpalm*, *PfΔcbr* and *PfΔhcs1*: Degenerated oocyst (absence of distinct sporozoite formation)

### *PfΔpalm*

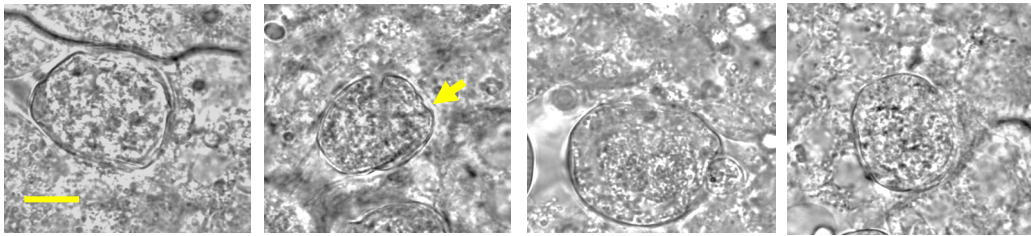

### *PfΔcbr*

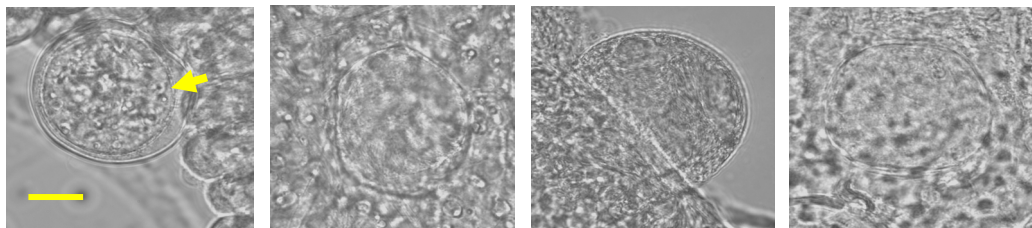

### *PfΔhcs1*

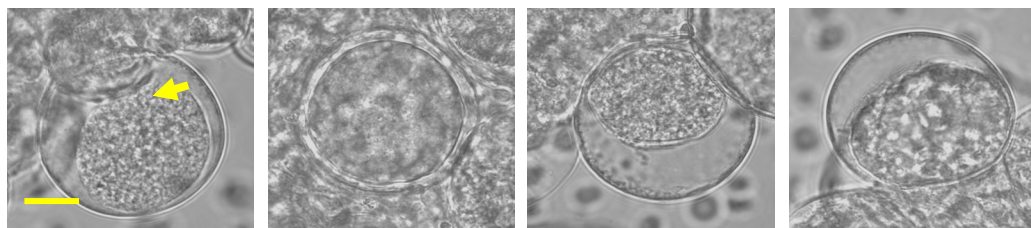

# Supplementary Figure 6

**a**

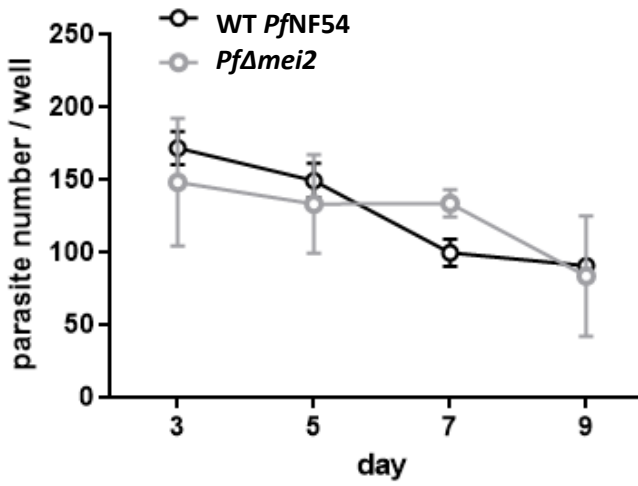

**b**

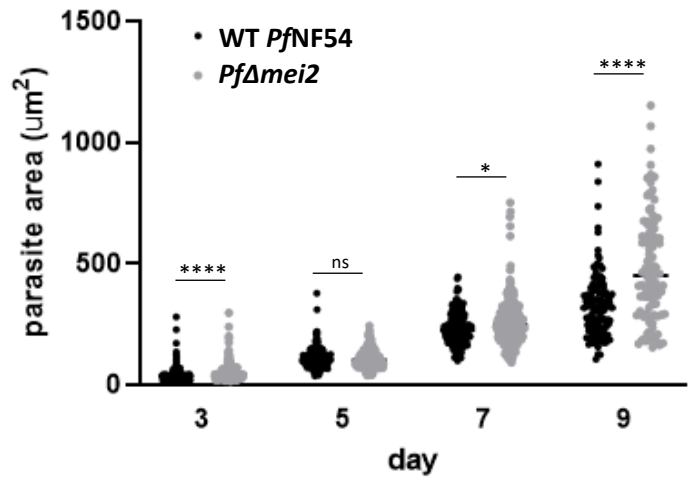

**c**

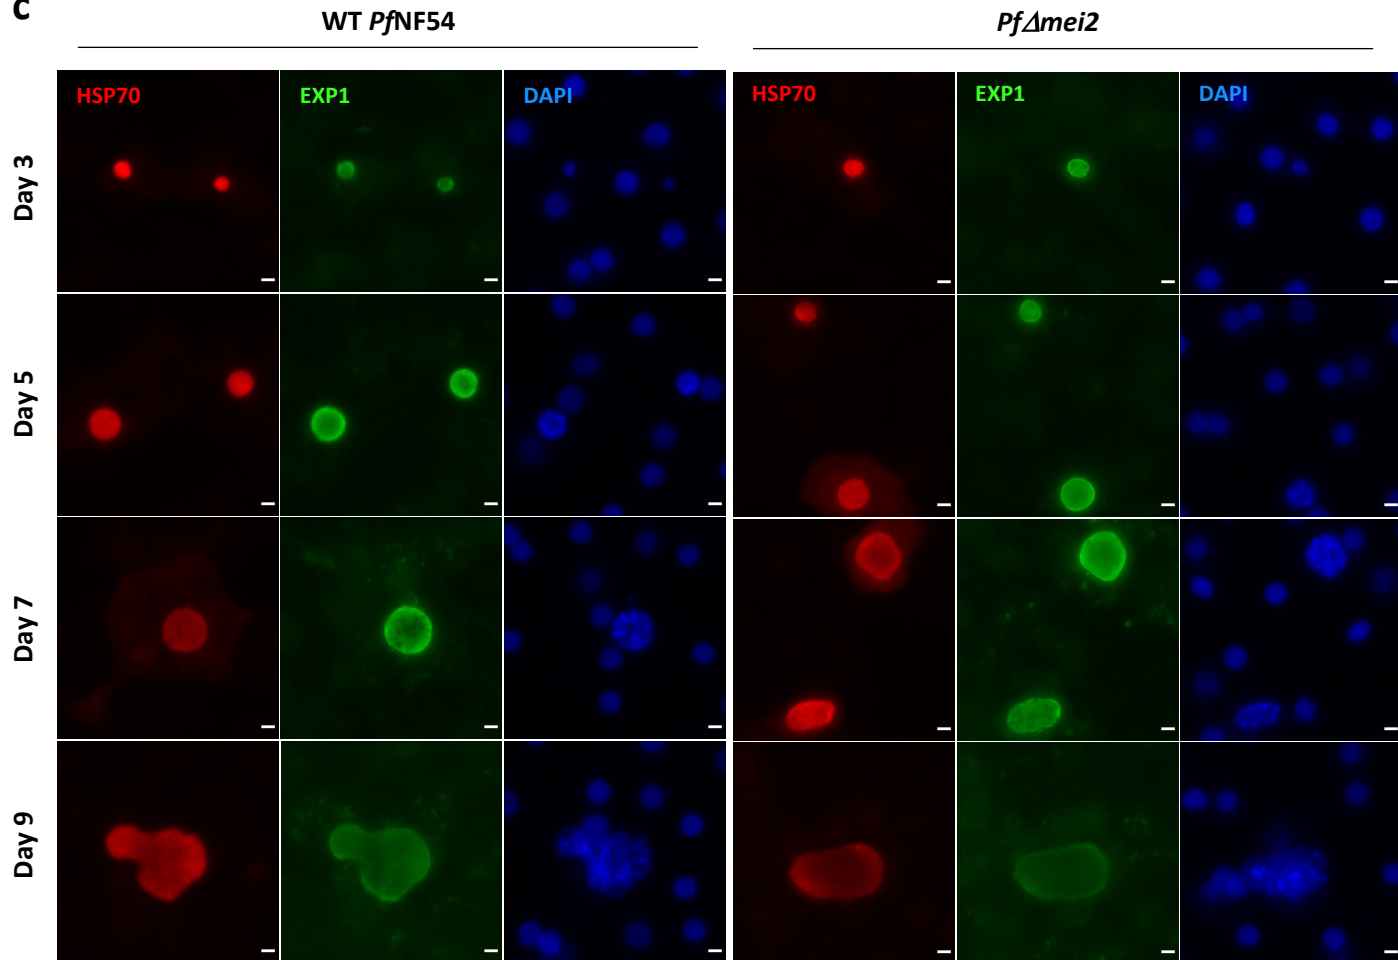

# Supplementary Figure 7

**a**

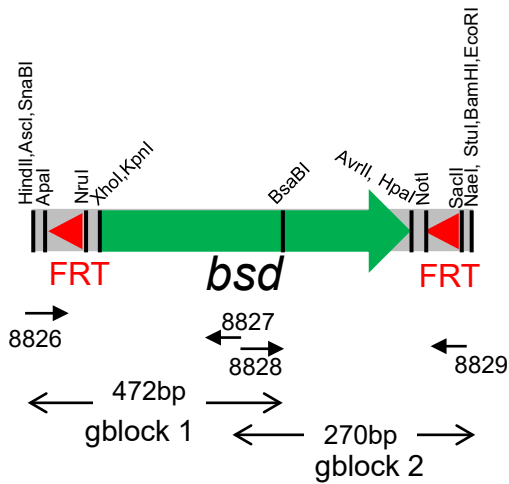

**b**

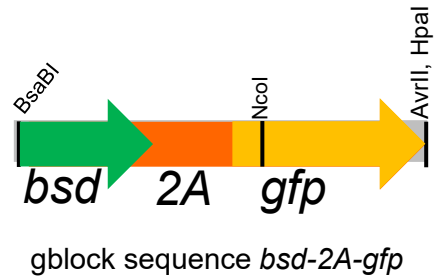

## **c** gblock sequence *bsd*

### gblock sequence 1 *HindIII*

TGATTACGCCAAGCTAAGAAG**AAGCTT**gtcagctaGGCGCGCCgtcagctaTACGTAgtcagctaGGGCCGtcagcta**Gaagttcct**  
**attctctagaagataggaacttc**TCGCGAgtcagctaCTCGAGgtcagctaGGTACCgtcagcta**ATGCATGCCAAGCCTTTGT**  
**CTCAAGAAGAATCCACCCTCATTGAAAGAGCAACGGCTACAATCAACAGCATCCCCATCTCTGAAGACTAC**  
**AGCGTCGCCAGCGCAGCTCTCTCTAGCGACGGCCGCATCTTCACTGGTGTCAATGTATATCATTTTACTG**  
**GGGGACCTTGTGCAGAACTCGTGGTGTCTGGGCACTGCTGCTGCTGCGGCAGCTGGCAACCTGACTTGTA**  
**TCGTAGCGATCGGAAATGAGAACAGGGGCATCTTGAGCCCTGCGGACGGTGCCGACAGGTGCTTCTCG**  
**ATCTGCATCTGGGATCAA**

*BsaB1*

### gblock sequence 2

*BsaB1*

**GATCTGCATCTCTGGGATCAAAGCCATAGTGAAGGACAGTGATGGACAGCCGACGGCAGTTGGGATTCGT**  
**GAATTGCTGCCCTCTGGTTATGTGTGGGAGGGCTAA**GTTAACgtcagctaCCTAGGgtcagctaGCGGCCGgtca  
 gcta**Gaagttcctattctctagaagatag**gaacttgcaCCGCGgtcagctaGCCGGCgtcagctaAGGCCTgtcagctaGGATCCgt  
 cagcta**GAATTC**TTCTTCAATTC**ACTGGCCGTC**

*EcoRI*

**d**

## gblock sequence *bsd-2a-gfp*

*BsaB1*

**GATCTGCATCTCTGGGATCAAAGCCATAGTGAAGGACAGTGATGGACAGCCGACGGCAGTTGGGATTCGTG**  
**AATTGCTGCCCTCTGGTTATGTGTGGGAGGGCGGAGAAGGAAGAGGAAGTTTATTAACATGTGGAGATGTA**  
**GAAGAAAATCCAGGACCAATG**AGTAAAGGAGAAGA**ACTTTTTCACTGGAGTTGTCCCAATTCTTGTTGAATTAG**  
**ATGGTGTATGTTAATGGGCACAAATTTTCTGTCACTGGAGAGGGTGAAGGTGATGCAACATACGGAAAACCTTA**  
**CCCTTAAATTTATTTGCACTACTGGAAAACCTGTTCCATGGCCAACACTTGTCACTACTTTTCGCGTATGGT**  
**CTTCAATGCTTTGCGAGATACCCAGATCATATGAAACAGCATGACTTTTTCAAGAGTGCCATGCCCGAAGGTT**  
**ATGTACAGGAAAGA**ACTTATTTTTCAAAGATGACGGGAACTACAAGACACGTGCTGAAGTCAAGTTTGAAG****  
**GTGATACCCTTGTTAATAGAATCGAGTTAAAAGGTATTGATTTTAAAGAAGATGGAAACATTCTTGGACACAA**  
**ATTGGAATACA**ACTATAACTCACACAATGTATACATCATGGCAGACAAAACAAAAGAATGGAATCAAAGTTAAT****  
**TTCAA**AATTAGACACAACATTGAAGATGGAAGCGTTCAACTAGCAGACCATTATCAACAAAATACTCCAATT****  
**GGCGATGGCCCTGTCTTTTACCAGACAACCATTACCTGTCCACACAATCTGCCCTTTCGAAAGATCCCAA**  
**CGAAAAGAGAGACCACATGGTCTTCTTGAGTTTGTAAACAGCTGCTGGGATTACACATGGCATGGATGAG**  
**CTCTACAAA**CCTAGGATTGTTAACGTC****

*AvrII*

*HpaI*

## Supplementary Figure 8

Un-cropped raw images for Figure 1B

PCR gel for Figure 1B

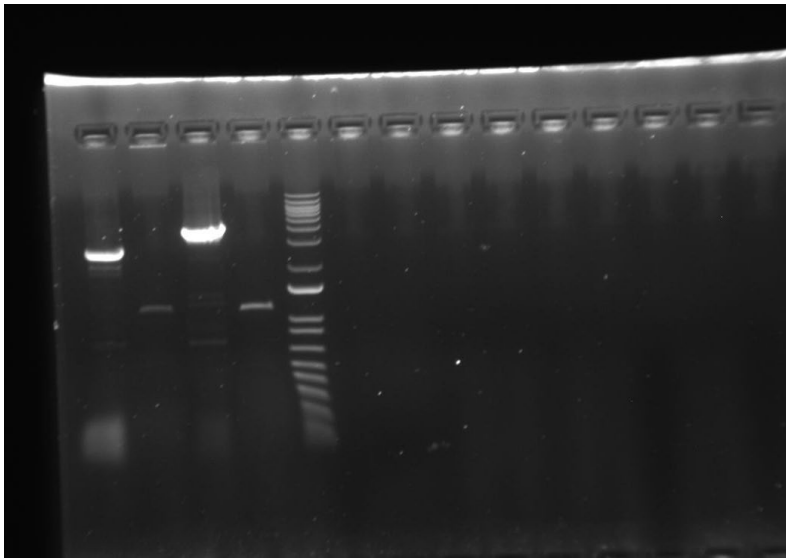



# Supplementary Figure 9

Un-cropped raw images for Figure 1C

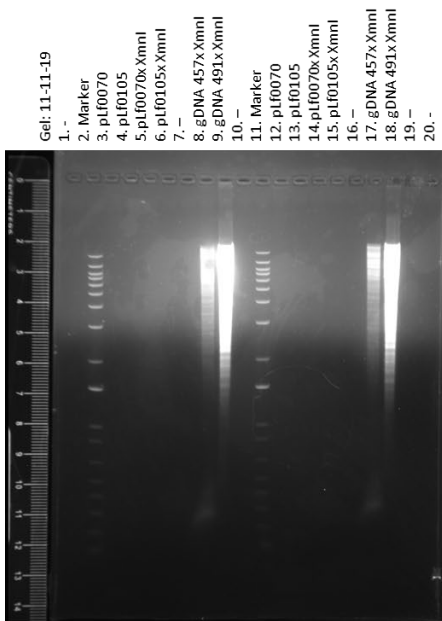

**Pf\_Southern016**  
Exposure 1hr

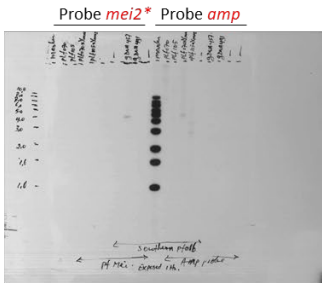

**Pf\_Southern016**  
Exposure 2hrs

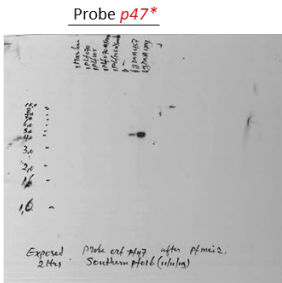

**Pf\_Southern016**  
Exposure o/n

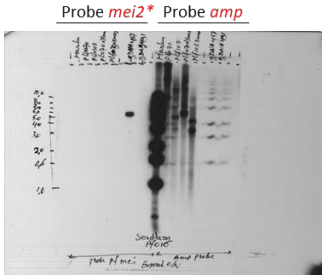

**Pf\_Southern016**  
Exposure o/n

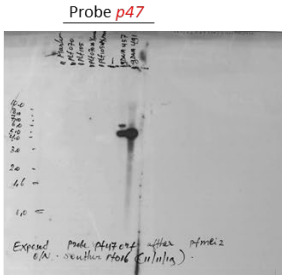

**Pf\_Southern016**  
Exposure o/n

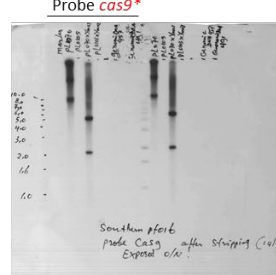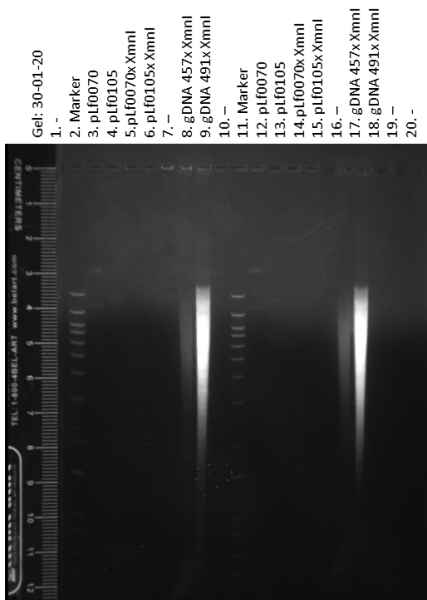

**Pf\_Southern018**  
Exposure 2,5hrs

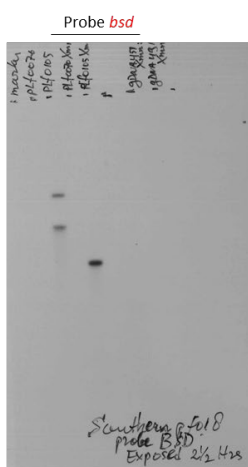

**Pf\_Southern018**  
Exposure 5 days

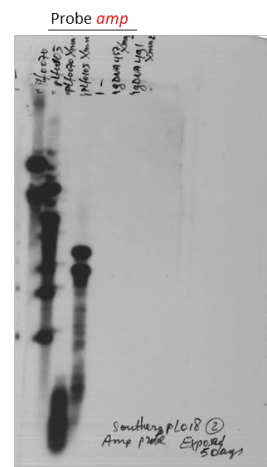

- 27-7-20
1. Marker
2. plf120 undig - 40 ng
3. plf120 dig - 40 ng
4. -
5. plf120 undig - 15 ng
6. plf120 dig - 15 ng
7. -
8. WT DNA dig
9. Exp.171cl1 DNA dig
10. -
11. Exp.171 undig cloned dig

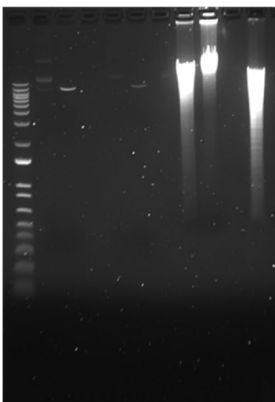

**Pf\_Southern025**  
Exposure 5 days

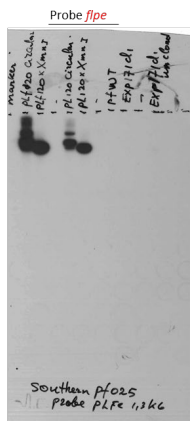

# Supplementary Figure 10

Un-cropped raw images for supplementary Figure 1B

PCR gel for Supplementary Figure 1B

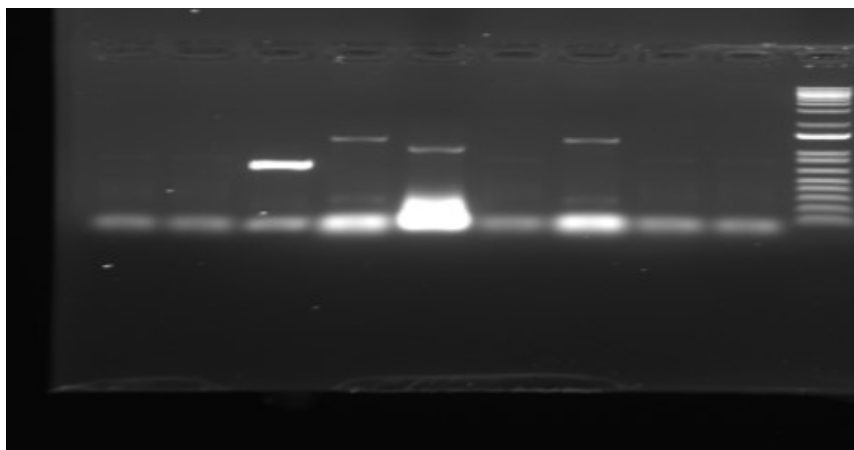

Blots of FIGE gels for Supplementary Figure 1B

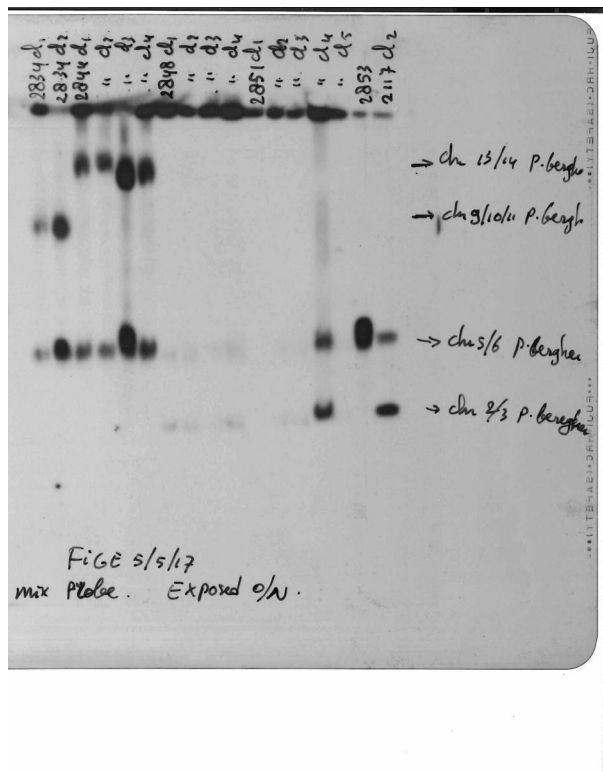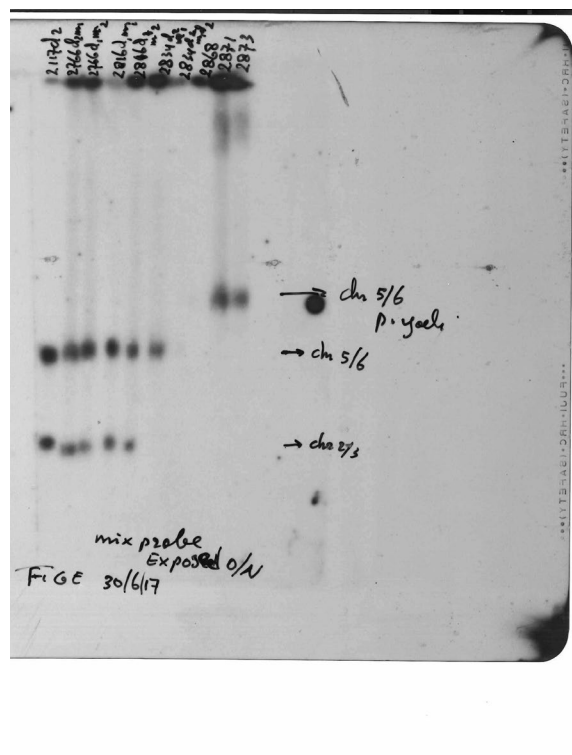

## Supplementary Figure 11

Un-cropped raw images of supplementary Figure 2B

PCR gel, upper panel

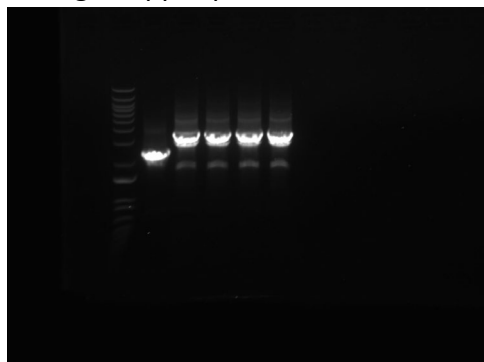

PCR gel, lower panel

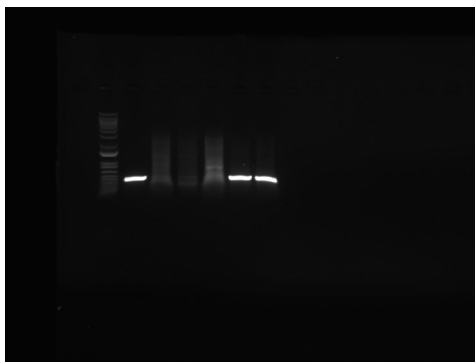

# Supplementary Figure 12

Un-cropped raw images of supplementary Figure 3B and 3C

PCR gel, upper panel 3B

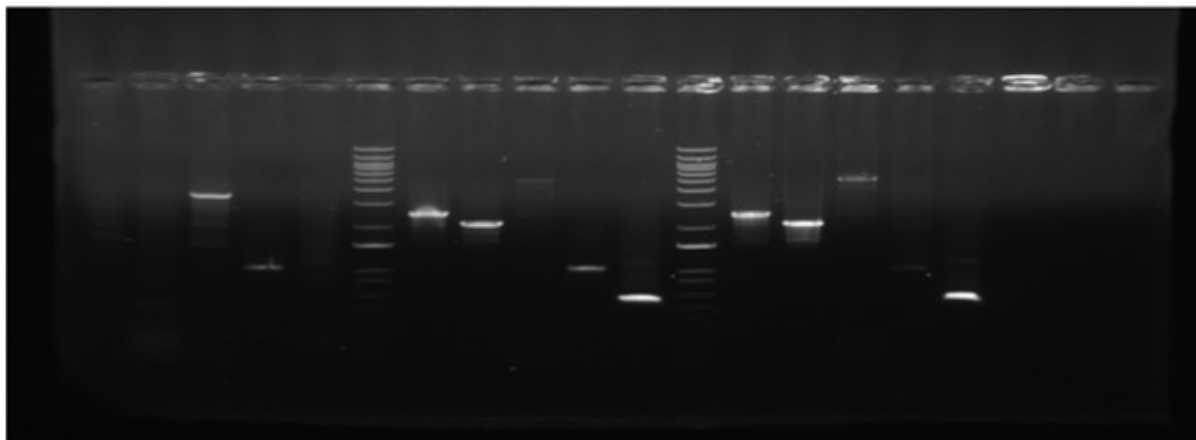

PCR gel, lower panel 3B

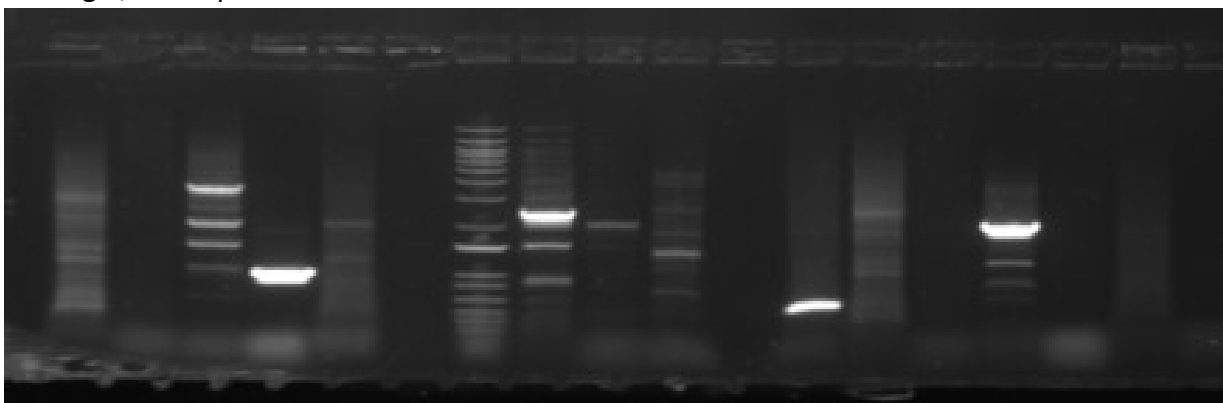

Blot of FIGE gel for Supplementary Figure 3C

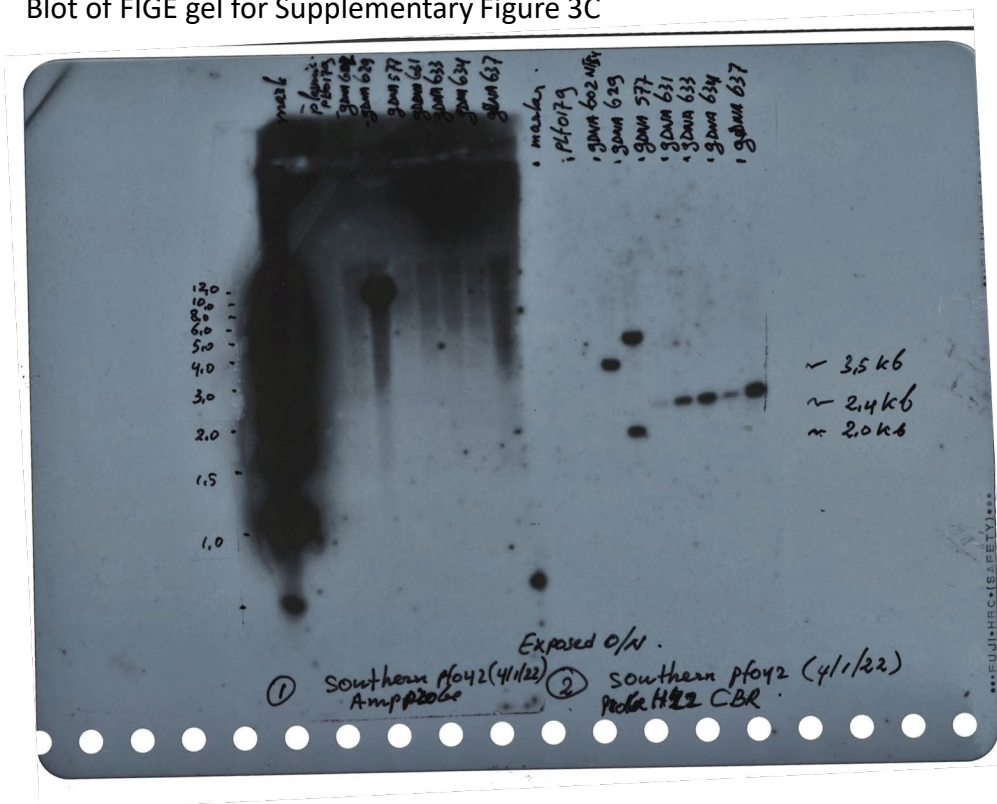

**Supplementary Figure 13**

Un-cropped raw images of supplementary Figure 4B

PCR gel for Supplementary Figure 4B

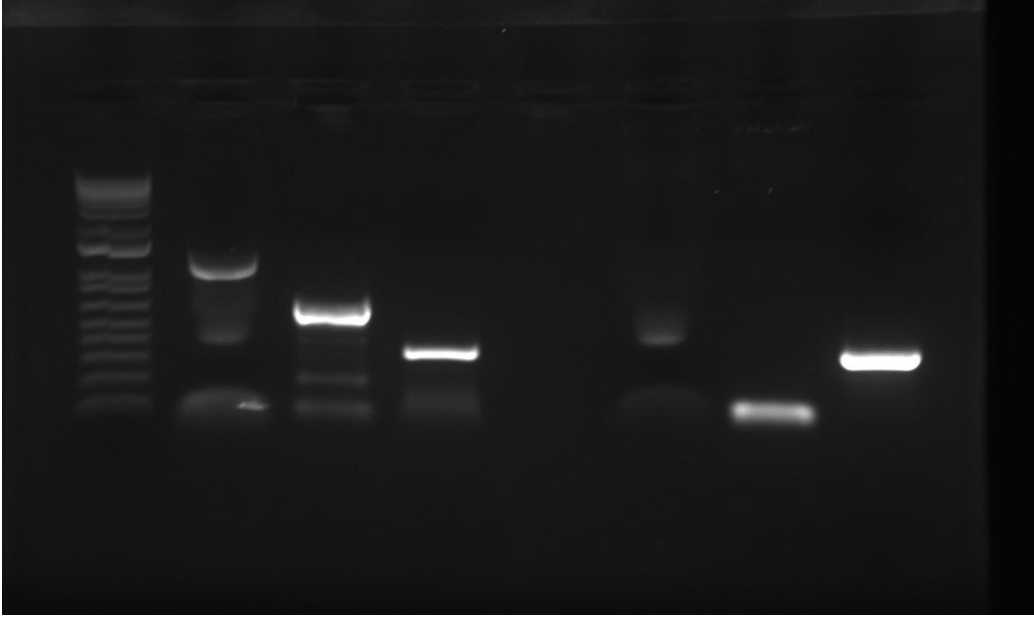

## 1 **Supplementary Figure legends**

### 2 **Supplementary Figure 1. Generation and genotype and phenotype analysis of the drug-selectable** 3 **marker free *P. berghei* ANKA gene-deletion mutant *PbΔmei2*.**

4

5 **a.** Schematic representation of the introduction of the *hdhfr-yfcu* selectable marker (SM) cassette  
6 into the *Pbmei2* gene locus of the parent *P. berghei* parasite (line 1868cl1). Construct pL2206  
7 contains the SM flanked by the *eef1α* promoter region and the 3'-*utr* of *pbdhfr* and integrates into  
8 the *mei2* locus by double cross-over homologous recombination at the *mei2* homology regions (HR1,  
9 HR2). Positive selection with pyrimethamine selects for parasites that have the *mei2* coding  
10 sequence replaced by the SM cassette, resulting in parasite line 2834cl2. To remove the SM cassette  
11 from the genome of 2834cl2, blood stage parasites of 2834cl2 were selected (negative selection) by  
12 treatment of infected mice with 5-Fluorocytosine (5-FC), selecting for parasites that have undergone  
13 homologous recombination between the two 3'-*utr* of *pbdhfr* untranslated regions present in the  
14 integrated construct pL2206, flanking the SM cassette and thereby removing the SM. This creates  
15 the SM free *PbΔmei2* gene-deletion mutant (2834cl2m1cl1). Location of primers (p) used for PCR  
16 analysis and PCR product sizes are shown. Primer details in **Table S1**.

17

18 **b.** Diagnostic PCR (left panel) and Southern analysis of PFG-separated chromosomes (right panel)  
19 confirm correct integration of construct pL2206 in parasites of line 2834cl2. PCR shows the presence  
20 of the *hdhfr::yfcu* SM (primers **p78/p79**); 5' integration PCR (5'-int; primers **p76/p77**); *mei2* open  
21 reading frame PCR (ORF; primers **p80/p81**). Primer locations and product sizes are shown in **A** and  
22 primer details in **Table S1**. Hybridization of PFG-separated chromosomes (chr.) (right panel) with a  
23 mixture of two probes, *hdhfr* probe and a control probe *p25* (PBANKA\_0515000; chromosome 5)  
24 shows the presence of the SM in the *mei2* locus on chromosome 11 in two clones of the 2834 line  
25 and the absence of the SM in the *mei2* locus on chromosome 11 in SM free *PbΔmei2* gene-deletion  
26 mutant (2834cl2m1cl1). M, molecular weight marker; 1kb DNA ladder (Invitrogen).

27

28 c. Representative fluorescence-microscopy images of live parasites at 48 hours after infection of  
29 cultures Huh7 hepatocytes with sporozoites of WT and *PbΔmei2*. Liver-stages express cytoplasmic  
30 mCherry under control of the constitutive *hsp70* promoter. Scale bar, 10μm.

31

32 d. Size of WT (black) and *PbΔmei2* (grey) liver-stages at different time points after infection of  
33 cultured hepatocytes. The size of parasites (n=20-70) was measured at each time point by  
34 determining the area of the parasite's cytoplasm at its greatest circumference using the mCherry-  
35 positive area (μm<sup>2</sup>). Nuclei of parasites and hepatocytes were stained with Hoechst (blue), scale bar:  
36 10 μm. Significance values (unpaired Mann Whitney test): \*\*p < 0.01; \*\*\*\*p < 0.0001; n.s. – not  
37 significant.

38

39 e. The time line showing infection of C57BL/6 mice by intravenous injection of 5 × 10<sup>4</sup> of WT  
40 (black) and *PbΔmei2* (grey) sporozoites, followed by determination of parasite liver loads in mice  
41 (n=6) by *in vivo* imaging. Parasite liver loads as determined by measuring *in vivo* luciferase activity  
42 and depicted as relative light units (RLU). Significance values (unpaired Mann Whitney test): \*p <  
43 0.05; \*\*p < 0.01; n.s. – not significant.

44 f. The time-line shows infection of C57BL/6 mice with sporozoites and determination of the  
45 prepatency of blood infection. The **Table** shows the time to blood-stage patency in C57BL/6 mice  
46 infected by intravenous injection of sporozoites.

47 Error bars represent standard error of the mean.

48

49 **Supplementary Figure 2. Generation, genotyping and blood-stage growth of *PfΔpalm***

50 a. Schematic representation (not drawn to scale) of the Cas9 (pLf0086) and the two Donor/gRNA  
51 plasmids (pLf0124 and pLf0125) constructs used to generate the two *PfΔpalm* lines (*PfΔpalm-1*, exp.  
52 167 and *PfΔpalm-2* exp.169). The *Pfpalm* homology regions (HR1, HR2), *blastidicin-S-deaminase*  
53 (*bsd*) selectable marker (SM) cassette, location of primers (black arrows) and PCR amplicons (black)  
54 are indicated. Primer sequences (in black) are shown in **Table S1**. WT - wild type *PfNF54*; human  
55 *dihydrofolate reductase-thymidylate synthase (hdhfr)* SM cassette; yeast cytosine deaminase uridyl  
56 phosphoribosyl transferase (*yfcu*) SM cassette; 5' *utr* heat shock protein 90 (*pfhsp90*), 5' *utr* heat  
57 shock protein 70 (*pfhsp70*), *ampicillin (amp)*, single guide RNA (sgRNA).

58 b. Diagnostic PCR confirms correct integration of the donor/gRNA construct by LR-PCR (primers  
59 p15/p16), presence of the *bsd* SM (primers p19/p20) and absence of the *Pfpalm* coding sequence in  
60 *PfΔpalm-1* and *PfΔpalm-2* parasites (primers p17/p18). Primer locations and product sizes are shown  
61 in **(A)** and primer details in **Table S1**. M, molecular weight marker; 1kb DNA ladder (Invitrogen).

62

63 c. *In vitro* growth rate of *PfΔpalm-1*, *PfΔpalm-2* and WT *PfNF54* asexual blood-stages. Parasitemia  
64 (%) during a 3-day culture period (mean and s.d. of 3 cultures). Error bars represent standard  
65 deviation.

### 66 **Supplementary Figure 3. Generation, genotyping and blood-stage growth of *PfΔcbr***

67 a. Schematic representation (not drawn to scale) of the Cas9/gRNA plasmid (pLf0178) and the Donor  
68 DNA plasmid (pLf0179) construct used to generate the *PfΔcbr* line (exp.236). The *Pfcbr* homology  
69 regions (HR1, HR2), the *blastidicin-S-deaminase (bsd)* selectable marker (SM) linked to *gfp* through  
70 the 2A peptide, location of primers (black arrows) and PCR amplicons (black) are indicated. Primer  
71 sequences (in black) are shown in **Table S1**. WT - wild type WT *PfNF54*; human *dihydrofolate*  
72 *reductase-thymidylate synthase (hdhfr)* SM cassette; yeast cytosine deaminase uridyl phosphoribosyl



73 transferase *yfcu*) SM cassette; 5' *utr* heat shock protein 90 (*pfhsp90*), 5' *utr* heat shock protein 70  
74 (*pfhsp70*), ampicillin (*amp*), single guide RNA (sgRNA).

75 **b.** Diagnostic PCR confirms correct integration of the donor/gRNA construct by 5' (primers p29/p30)  
76 and 3' integration (primers **p31/p32**), presence of the *bsd* SM (primers **p19/p33**) and absence of the  
77 *Pfcbr* open reading frame (primers p34/p35) in *PfΔcbr* parasites. Primer locations and product sizes  
78 are shown in **(A)** and primer details in **Table S1**. M, molecular weight marker; 1kb DNA ladder  
79 (Invitrogen).

80

81 **c.** Southern analysis of digested DNA of WT *PfNF54* and *PfΔcbr* confirms *Pfcbr* gene deletion. DNA  
82 was hybridized with a probe targeting the HR2 of *Pfcbr* (primers **p31/p32**) and control probe  
83 targeting ampicillin (*amp*, primers **p36/p37**). The hybridization fragments of WT *PfNF54* (3.6 kb) are  
84 absent in the *PfΔcbr*, and the two fragments (1.9 and 5.0 kb) of the single crossing-over integration  
85 were present in *PfΔcbr*, indicating removal the *Pfcbr* coding sequence by single cross-over  
86 integration. Product sizes are shown in **(A)**. Primer details in **Table S1**.

87 **d.** *In vitro* growth rate of *PfΔcbr* and WT *PfNF154* asexual blood-stages. Parasitemia (%) during a 4-  
88 day culture period (mean and s.d. of 3 cultures). Error bars represent standard deviation.

89

#### 90 **Supplementary Figure 4. Generation, genotyping and blood-stage growth *PfΔhcs1***

91 **a.** Schematic representation (not drawn to scale) of the Cas9/gRNA plasmids (pLf0193, pLf0194) and  
92 the Donor DNA plasmid (pLf0191) construct used to generate the *PfΔhcs1* line (exp.236). The *Pfhcs1*  
93 homology regions (HR1, HR2), the *blastidicin-S-deaminase* (*bsd*) selectable marker (SM) linked to *gfp*  
94 through the 2A peptide, location of primers (black arrows) and PCR amplicons (black) are indicated.  
95 Primer sequences (in black) in **Table S1**. WT - wild type WT *PfNF54*; human *dihydrofolate reductase-*  
96 *thymidylate synthase* (*hdhfr*) SM cassette; yeast cytosine deaminase uridyl phosphoribosyl

97 transferase *yfcu*) SM cassette; 5' *utr* heat shock protein 90 (*pfhsp90*), 5' *utr* heat shock protein 70  
98 (*pfhsp70*), ampicillin (*amp*), single guide RNA (sgRNA).

99 **b.** Diagnostic PCR confirms correct integration of the donor/gRNA construct by 5' (primers **p15/p16**)  
100 and 3' integration (primers **p46/p47**), presence of the *bsd* SM (primers **p48/p49**) and absence of the  
101 *Pfhcs1* open reading frame in *PfΔhcs1* parasites (primers **p50/p51**). Primer locations and product  
102 sizes are shown in **A** and primer details in **Table S1**. M, molecular weight marker; 1kb DNA ladder  
103 (Invitrogen).

104

105 **c.** *In vitro* growth rate of *PfΔhcs1* and WT *Pf* NF154 asexual blood-stages. Parasitemia (%) during a 4-  
106 day culture period (mean and s.d. of 3 cultures). Error bars represent standard deviation.

107

108 **Supplementary Figure 5. Oocyst of WT *Pf*NF54, *PfΔmei2*, *PfΔpalm*, *PfΔcbr* and *PfΔhcs1* parasites**

109

110 **a.** Light microscope pictures of oocysts from days 9-12 after feeding gametocytes to *An. stephensi*  
111 mosquitoes. Sporozoite formation in oocysts from WT *Pf*NF54 and *PfΔmei2* while no sporozoite  
112 formation observed in *PfΔpalm*, *PfΔcbr* and *PfΔhcs1* oocysts. These oocysts are classified as  
113 degenerate based on the absence of distinct sporozoite formation and/or vacuolated cytoplasm.  
114 Midgut sporozoites (MGS). Scale bar, 10μm.

115

116 **Supplementary Figure 6: *PfΔmei2* liver-stage development in cultured human primary hepatocytes**

117 **(LONZA)**

118 **a.** Number of WT *Pf*NF54 and *PfΔmei2* parasites per well at day3, 5, 7 and 9 p.i. Error bars represent  
119 standard error of the mean.

120

121 **b.** Liver-stage size on day 3, 5, 7 and 9 p.i. (99-245 parasites measured in 2 wells). The average of the  
122 parasite's cytoplasm at its greatest circumference using HSP70-positive area ( $\mu\text{m}^2$ ), s.d. and  
123 significances values are shown (unpaired Mann Whitney test: \* $p < 0.05$ ; \*\*\*\* $p < 0.0001$ ; ns: not  
124 significant).

125 **c.** Representative confocal microscopy images of liver-stages on days 3, 5, 7 and 9 p.i. Left panel WT  
126 *Pf*NF54; right panel *Pf* $\Delta$ mei2. Fixed hepatocytes were stained with the following antibodies: mouse  
127 anti-*Pf*HSP70 ( $\alpha$  hsp70) and rabbit anti-*Pf*EXP1 ( $\alpha$  exp1). Nuclei stained with Dapi. All pictures were  
128 analyzed using a Cell Insight High Content Screening platform equipped with the Studio HCS  
129 software; Alexa Fluor® 488 (green); anti-IgG Alexa Fluor® 594 (red); Dapi (blue). Scale bar, 5 $\mu\text{m}$ .

130

131

132 **Supplementary Figure 7: Generation of the *bsd* selectable marker cassette of plasmid pLf0103**

133 **a.** Schematic representation of the *blasticidin-S-deaminase* (*bsd*) selectable marker (SM, in green),  
134 flanked by 2 *frt* sites (in red) and restriction sites generated by ligating two gblocks. Primers and PCR  
135 fragment are indicated (primer details in **Table S1**).

136 **b.** Schematic representation of the *bsd-2A-gfp* expression cassette (*bsd* in green, 2A in orange and  
137 *gfp* in yellow). Restriction sites are indicated.

138 **c.** Sequences of the 2 gblocks used to generate the *bsd* SM (in green), flanked by 2 *frt* sites.

139 **d.** Sequence of the gblock used to generate the *bsd-2A-gfp* expression cassette (*bsd* in green, 2A in  
140 orange and *gfp* in yellow).

141

142 **Supplementary Figure 8: Raw original images for Figure 1B**

143 **Supplementary Figure 9: Raw original images for Figure 1C**

144 **Supplementary Figure 10: Raw original images for Supplementary Figure 1B**

145 **Supplementary Figure 11: Raw original images for Supplementary Figure 2B**

146 **Supplementary Figure 10: Raw original images for Supplementary Figure 3B and 3C**

147 **Supplementary Figure 10: Raw original images for Supplementary Figure 4B**

148

149

150

151

152

153

154
